# Supplementary material for: Synthetic hookworm-derived peptides are potent modulators of primary human immune cell function that protect against experimental colitis in vivo
Source: PubMed Central journal article supplement — J Biol Chem. 2021 May 27;297(1):100834. doi: 10.1016/j.jbc.2021.100834 (PMC8239465; doi:10.1016/j.jbc.2021.100834), 2021-05-27
Supplement: mmc1.pdf [file mmc1.pdf]

## Supporting Information

### **Synthetic hookworm-derived peptides are potent modulators of primary human immune cell function that protect against experimental colitis *in vivo***

Taylor B. Smallwood<sup>1\*</sup>, Severine Navarro<sup>2,3,4\*</sup>, Ben Cristofori-Armstrong<sup>1</sup>, Thomas S. Watkins<sup>2,6</sup>, Katie Tungatt<sup>2,5,6</sup>, Rachael YM. Ryan<sup>2,5,6</sup>, Oscar L. Haigh<sup>2</sup>, Viviana P. Lutzky<sup>2</sup>, Jason P. Mulvenna<sup>2</sup>, K. Johan Rosengren<sup>1</sup>, Alex Loukas<sup>6</sup>, John J. Miles<sup>2,3,5,6,7\*</sup> and Richard J. Clark<sup>1,\*</sup>

<sup>1</sup>The University of Queensland, Faculty of Medicine, School of Biomedical Sciences, QLD 4072, Australia

<sup>2</sup>QIMR Berghofer Medical Research Institute, Brisbane, QLD 4006, Australia

<sup>3</sup>The Australian Institute of Tropical Health and Medicine, James Cook University, QLD 4878, Australia

<sup>4</sup>Woolworths Centre for Child Nutrition Research, Institute of Health and Biomedical Innovation, Queensland University of Technology, QLD 4101, Australia

<sup>5</sup>Centre for Tropical Bioinformatics and Molecular Biology, James Cook University, QLD 4878, Australia

<sup>6</sup>Centre for Molecular Therapeutics, The Australian Institute of Tropical Health and Medicine, James Cook University, QLD 4878, Australia

<sup>7</sup>Institute of Infection and Immunity, Cardiff University School of Medicine, Henry Wellcome Building, University Hospital, Cardiff, CF14 4XN, Wales, United Kingdom

\*these authors contributed equally to this work.

#### **Material included**

Figure S1: Electrospray ionisation mass spectrometry spectra of final hookworm peptides

Figure S2: Preliminary functional cytometric bead array screening of synthetic hookworm peptides

Figure S3: The NOESY and TOCSY spectra overlay of Acan1 and Nak1

Figure S4: Solution NMR structures of Acan1 and Nak1 without enforcing disulfide bonds

Table S1. NMR distance and dihedral statistics

Table S2. Structural statistics for Acan1 and Nak1 from CYANA

Figure S5: Annexin V-FITC Apoptosis assay flow plots of whole peripheral blood mononuclear cells (PMBC) incubated with hookworm peptide

Figure S6: Intracellular cytokine staining assay to assess IL-6, IL-8 and MIP-1 $\beta$  production in classical (CD14<sup>+</sup>) or intermediate (CD14<sup>+</sup>/CD16<sup>+</sup>) monocytes (MNCs), when exposed to Nak1 or ShK.

Figure S7: Mixed lymphocyte reaction with Acan1

Figure S8: Example gating of CellTrace Violet T cell proliferation assay of negative depleted T cells incubated with Acan1

Figure S9: Mouse body weight was recorded daily for the indicated groups

Table S3: Nanostring custom CodeSet panel

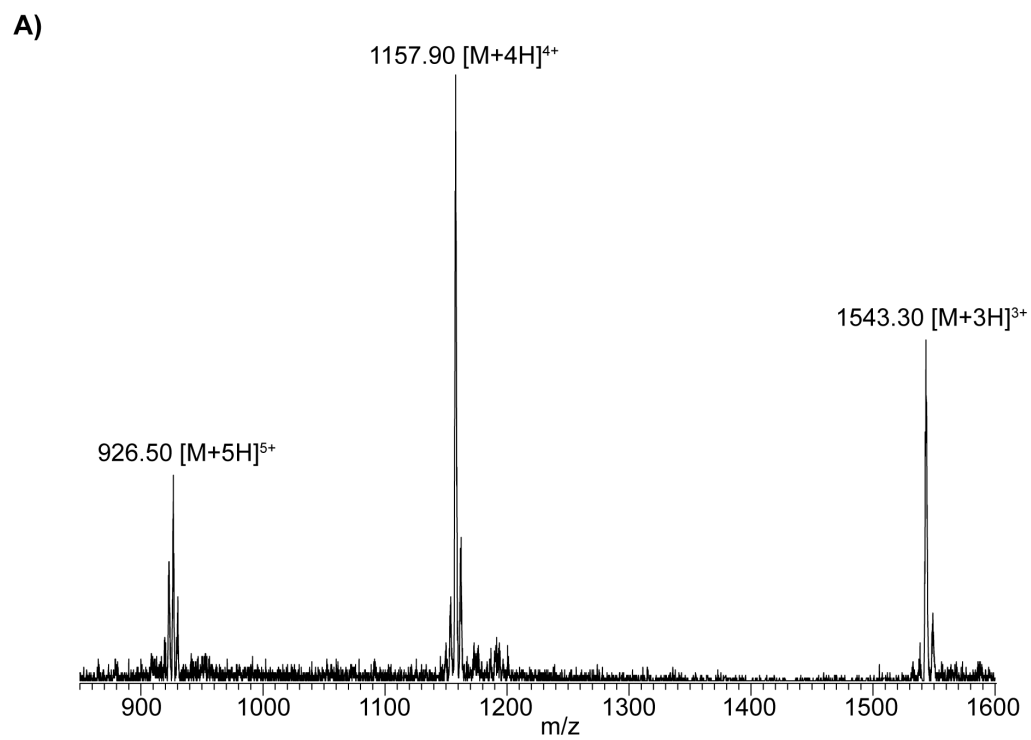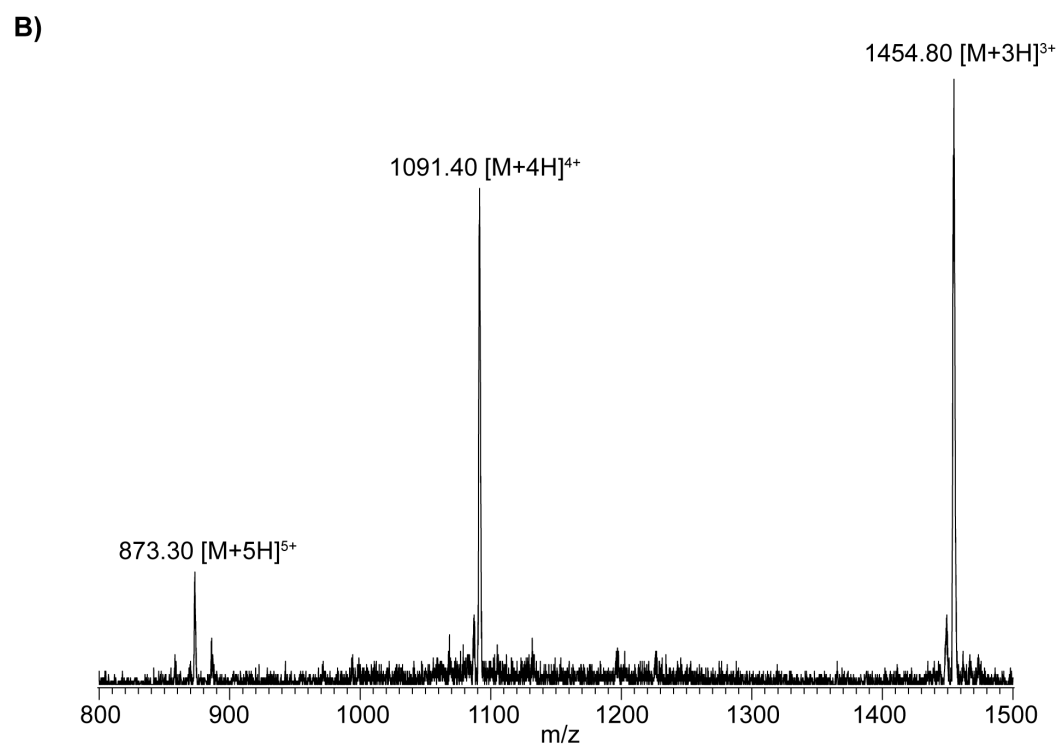

Figure S1: Electrospray ionisation mass spectrometry spectra of final peptides **A)** Acan1 and **B)** Nak1

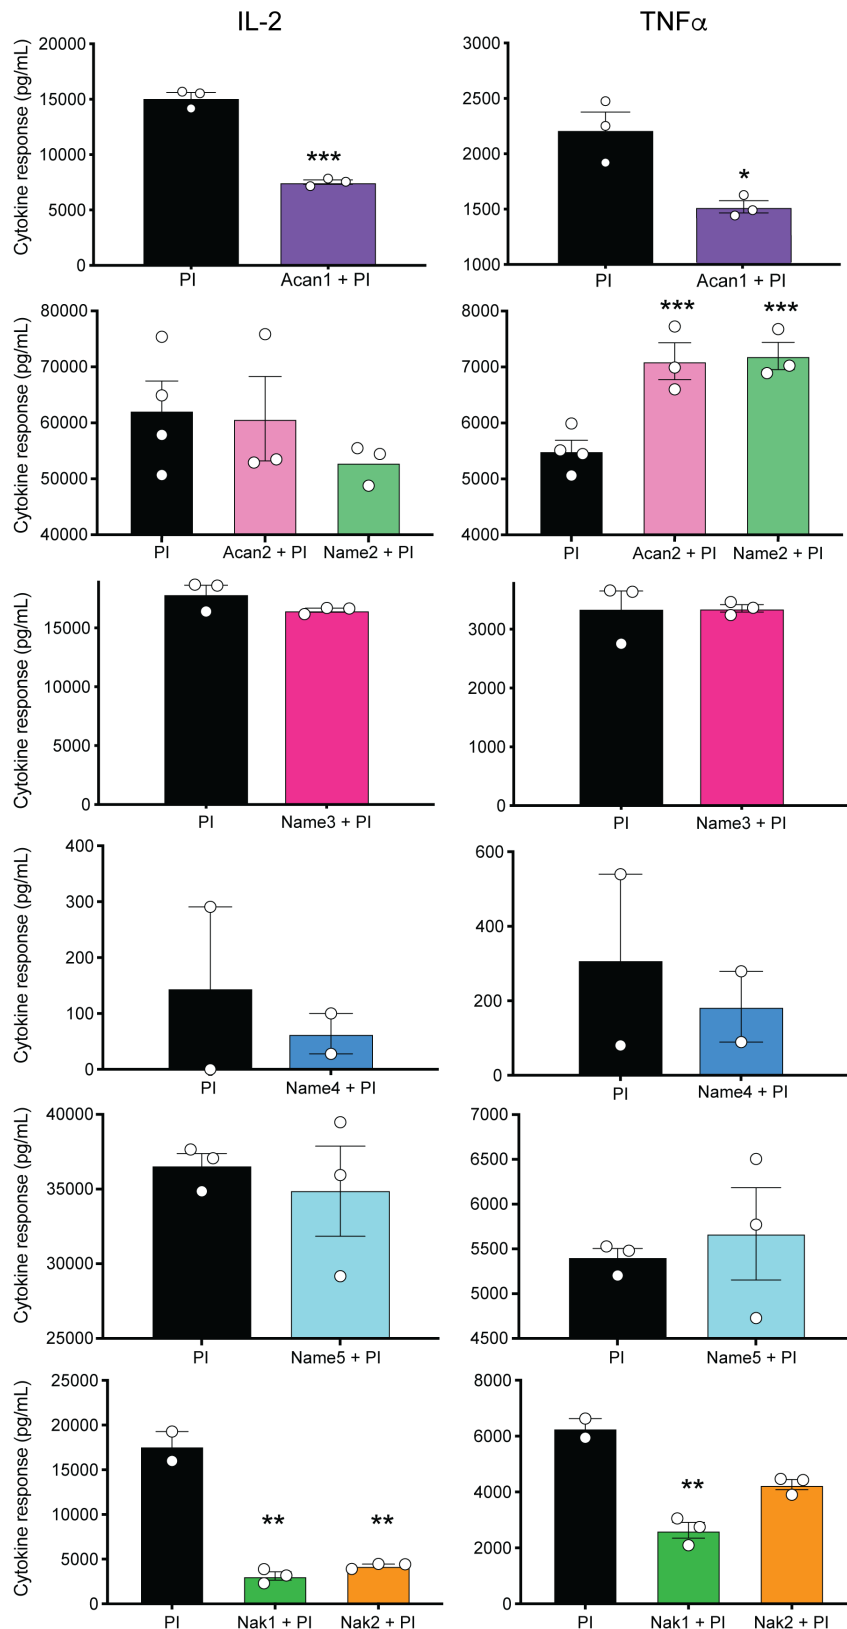

Figure S2: Preliminary functional cytometric bead array (CBA) screening of synthetic hookworm peptides. Human peripheral blood mononuclear cells were stimulated with phorbol 12-myristate 12-acetate (50 ng/mL) + ionomycin (1  $\mu$ g/mL) (PI) then treated with 100  $\mu$ g/mL hookworm peptides for 24 h. The concentrations of soluble IL-2 and TNF in the culture supernatant were assessed by CBA and flow cytometry (BD LSRFortessa).

A)

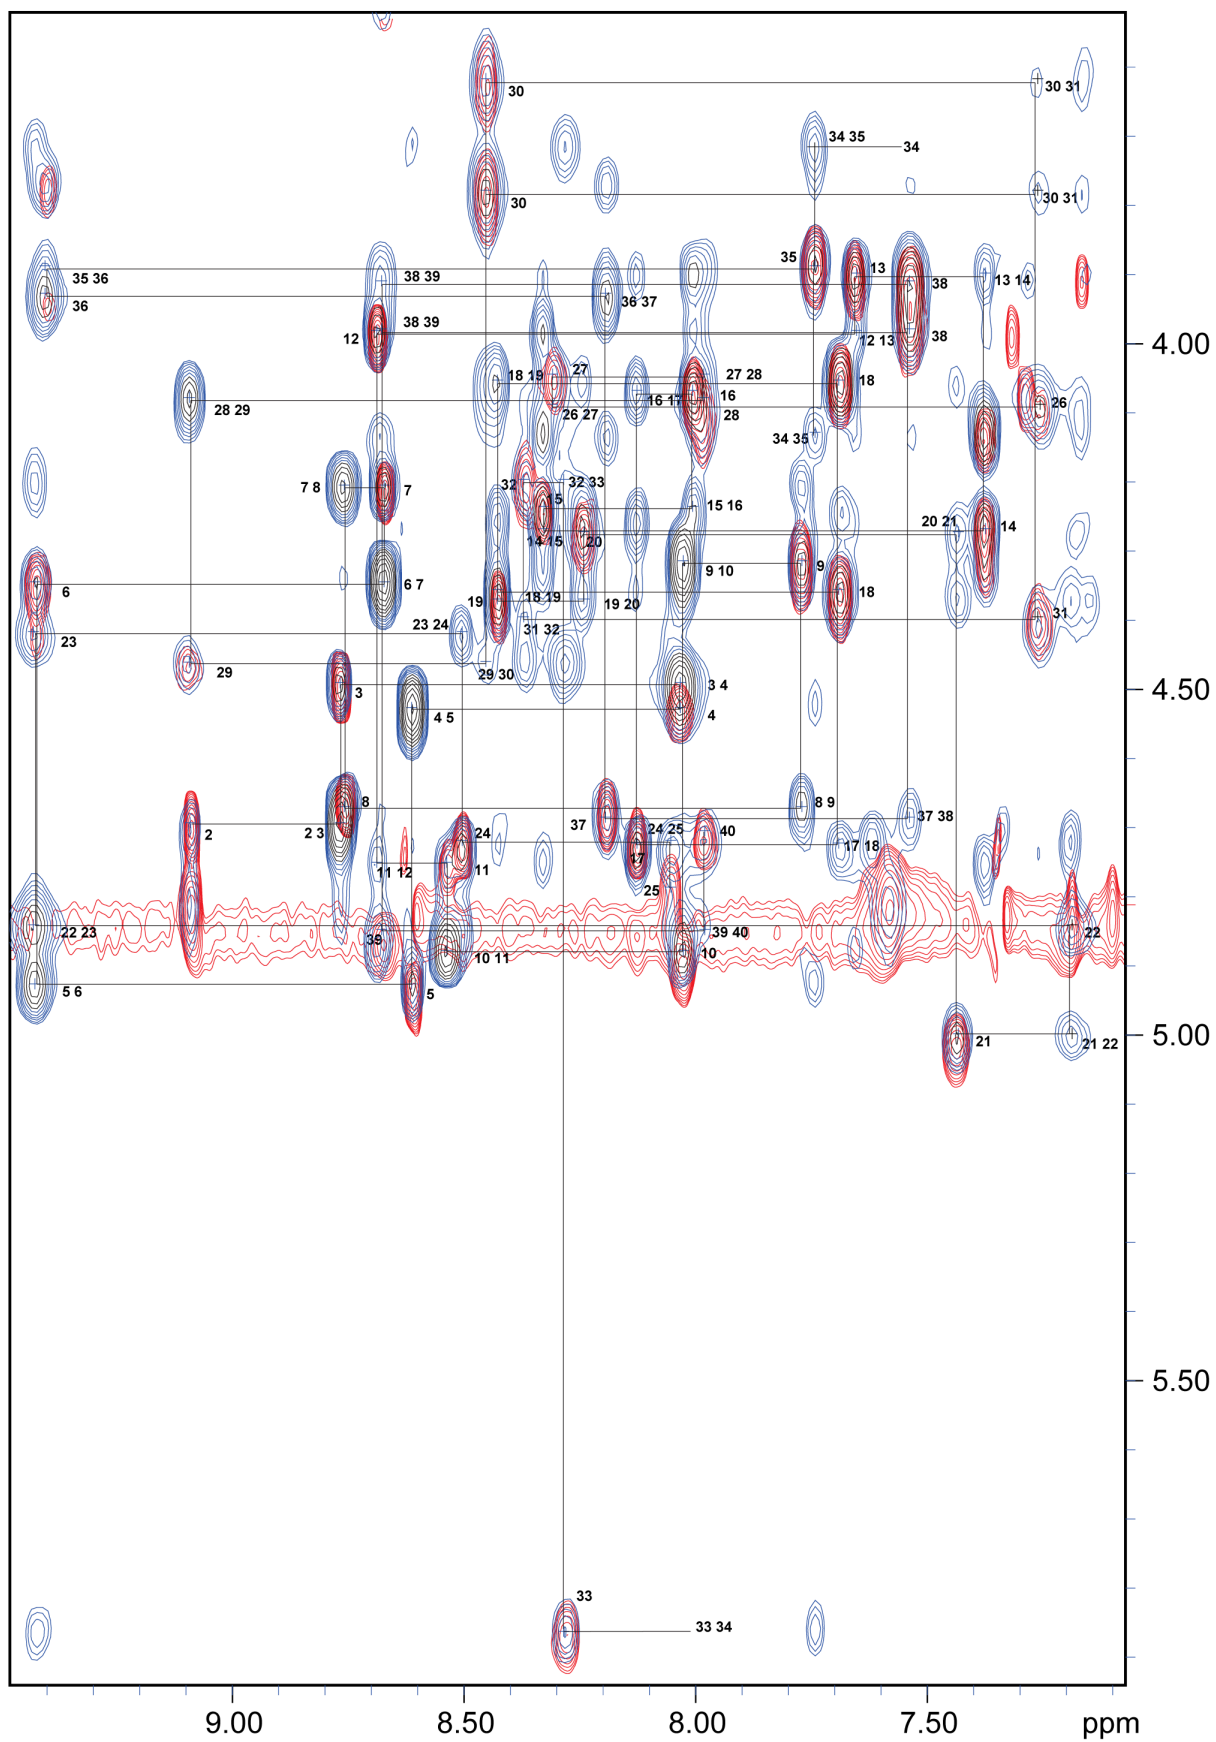

B)

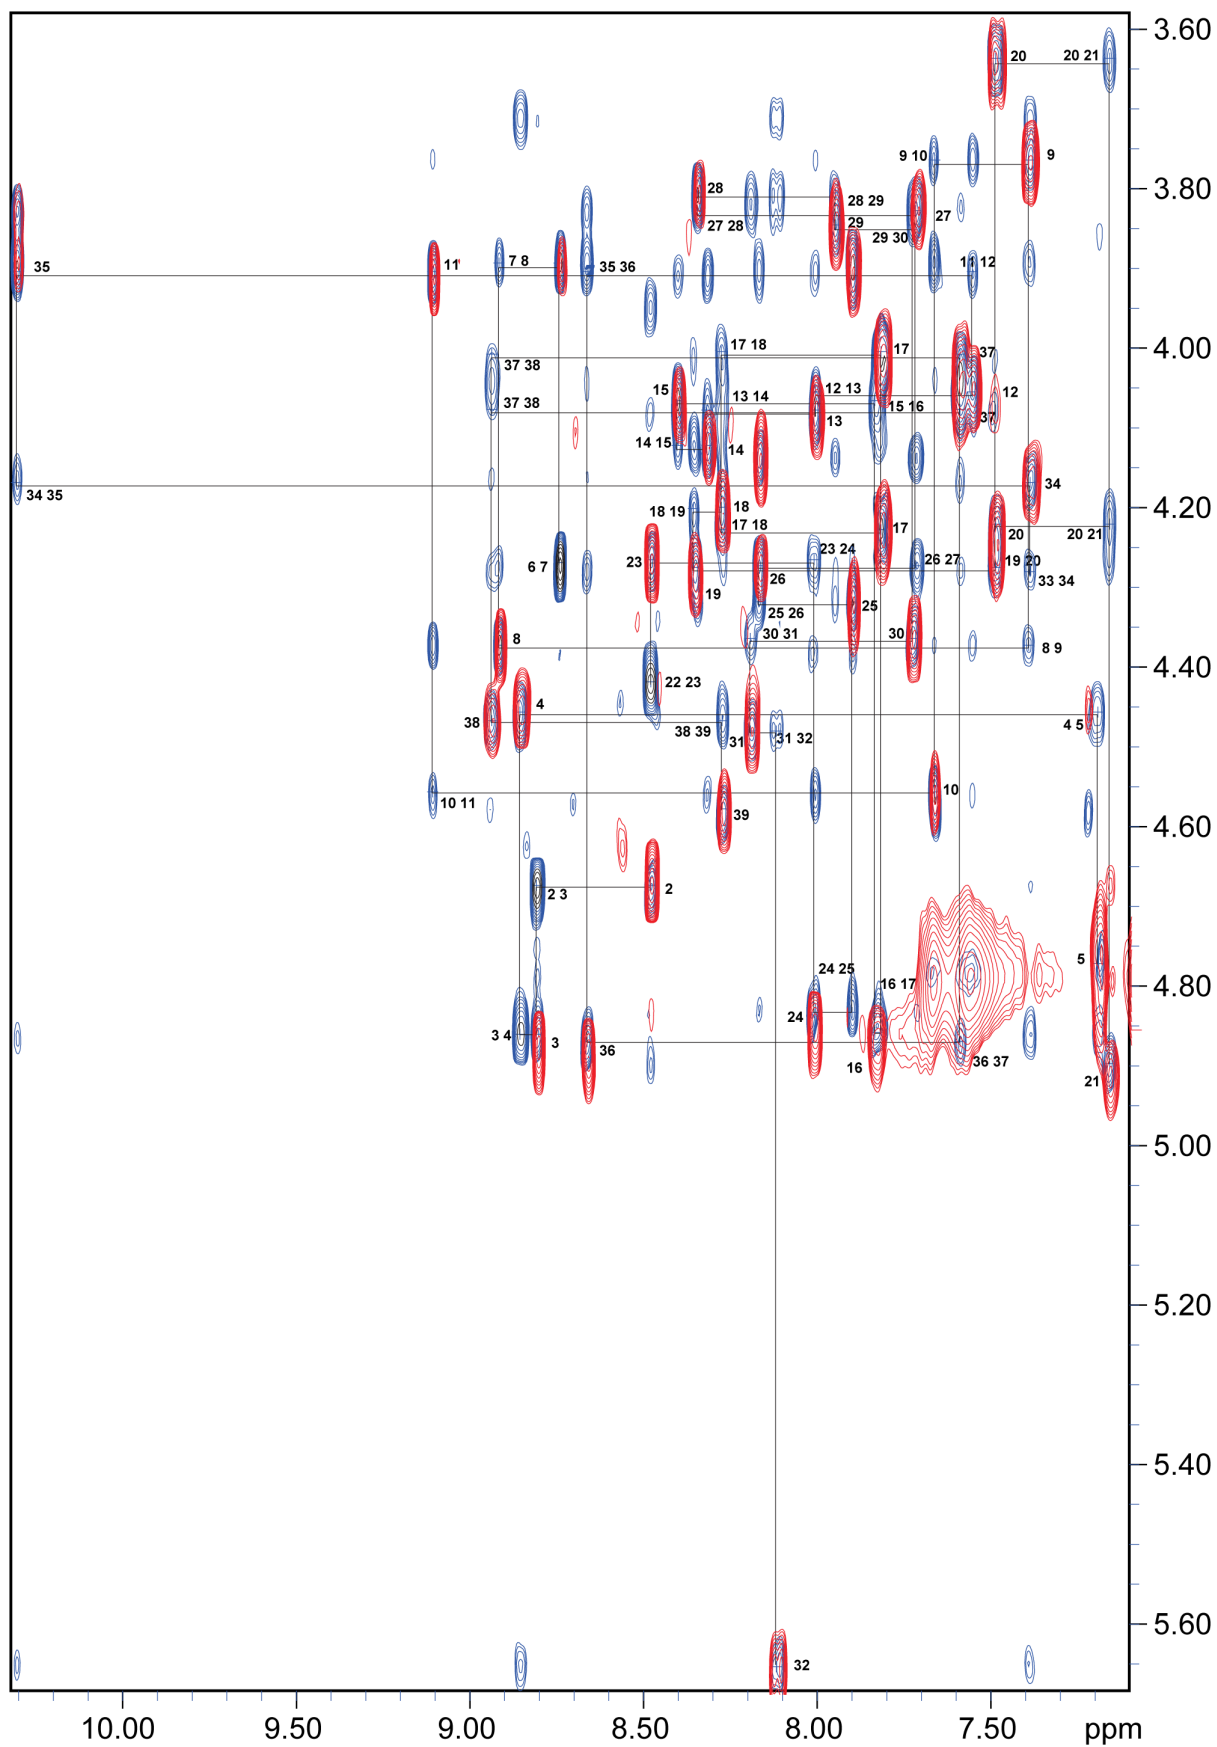

Figure S3: The NOESY and TOCSY spectra overlay of **A)** Acan1 and **B)** Nak1. Hookworm peptide was dissolved in 90% H<sub>2</sub>O and 10% D<sub>2</sub>O to give a final concentration of 0.5 mM, with data acquired using a Bruker Avance 600 MHz NMR spectrometer. All Spectra were recorded at 298 K. Residue numbers and lines highlight the sequential walk between intra H<sub>α</sub>-H<sub>N</sub> peaks and sequential H<sub>α</sub>-H<sub>N+1</sub> peaks.

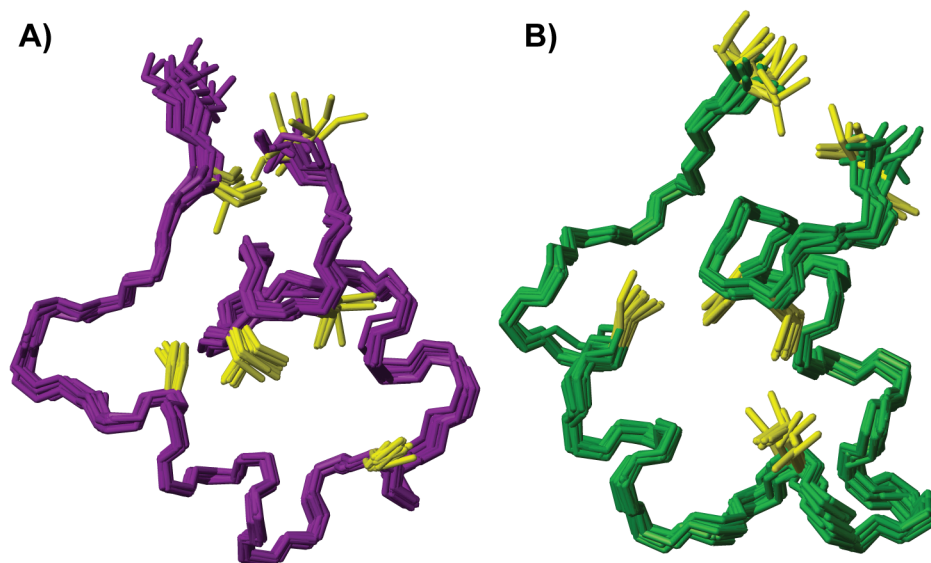

Figure S4: Solution NMR structures of Acan1 and Nak1. The 15 lowest energy structures of **A)** Acan1 and **B)** Nak1 calculated using CYANA without enforcing disulfide bonds. Cysteine side chains are shown in yellow. Images were produced in MOLMOL.



Table S1. NMR distance and dihedral statistics for Acan1 and Nak1

|                                                | <b>Acan1</b>    | <b>Nak1</b>    |
|------------------------------------------------|-----------------|----------------|
| <b>Distance restraints</b>                     |                 |                |
| Intra residual ( $i-j = 0$ )                   | 167             | 205            |
| Sequential ( $i-j = 1$ )                       | 175             | 193            |
| Medium range ( $i-j < 5$ )                     | 116             | 154            |
| Long range ( $i-j \geq 5$ )                    | 63              | 74             |
| Hydrogen bonds (HB)                            | 14 (for 7 HB)   | 36 (for 18 HB) |
| Total                                          | 535             | 662            |
| <b>Dihedral angle restraints</b>               |                 |                |
| $\Phi$                                         | 36              | 29             |
| $\chi^1$                                       | 13              | 19             |
| $\Psi$                                         | 34              | 29             |
| Total                                          | 83              | 77             |
| <b>Violations from experimental restraints</b> |                 |                |
| NOE violations exceeding 0.2 Å                 | 3               | 0              |
| Dihedral violations exceeding 2.0°             | 2               | 0              |
| <b>Atomic RMSD (Å) ^</b>                       |                 |                |
| Backbone atoms                                 | 0.89 ± 0.24     | 0.73 ± 0.17    |
| Heavy atoms                                    | 1.62 ± 0.20     | 1.43 ± 0.17    |
| <b>Molprobit</b>                               |                 |                |
| Clash Score, all atoms                         | 15.24 ± 3.60    | 14.09 ± 3.5    |
| Poor rotamers                                  | 0.300 ± 0.47    | 0.4 ± 0.5      |
| Ramachandran favoured (%)                      | 95.29 ± 2.73    | 90.13 ± 14.19  |
| Ramachandran outliers (%)                      | 98.81 ± 1.59    | 99.59 ± 0.98   |
| Molprobit score                                | 1.83 ± 0.14     | 1.80 ± 0.19    |
| Molprobit score percentile                     | 82.95 ± 6.32    | 84.35 ± 7.5    |
| Bad backbone bonds/angles                      | 0 / 0.05 ± 0.22 | 0 / 0          |

^ Atomic RMSD calculated over residues Cys3 - Cys40 for Acan1 and Asp3 – Gly37 for Nak1

Table S2. Structural statistics for Acan1 and Nak1 from CYANA

| <b>Acan1</b> | <b>DB 1</b> | <b>DB 2</b> | <b>DB 3</b> | <b>Violations</b> | <b>Target function avg</b> | <b>Avg backbone RMSD Å</b> |
|--------------|-------------|-------------|-------------|-------------------|----------------------------|----------------------------|
| No bonds     | -           | -           | -           | 0                 | 0.12                       | 0.54 +/- 0.31              |
| 1            | 3-40        | 11-33       | 20-37       | 0                 | 7.99E-02                   | 0.21 +/- 0.05              |
| 2            | 3-40        | 11-37       | 20-33       | 4 (2 x Cys)       | 0.53                       | 0.32 +/- 0.07              |
| 3            | 3-40        | 11-20       | 37-33       | 3 (2 x Cys)       | 0.28                       | 0.53 +/- 0.11              |
| 4            | 3-33        | 11-40       | 20-37       | 3 (1 x Cys)       | 0.71                       | 0.30 +/- 0.11              |
| 5            | 3-33        | 11-37       | 20-40       | 3                 | 0.30                       | 0.26 +/- 0.05              |
| 6            | 3-33        | 11-20       | 37-40       | 1                 | 0.27                       | 0.86 +/- 0.27              |
| 7            | 3-37        | 11-33       | 40-20       | 3 (1 x Cys)       | 0.50                       | 0.30 +/- 0.05              |
| 8            | 3-37        | 11-20       | 33-40       | 4 (1 x Cys)       | 0.59                       | 0.70 +/- 0.22              |
| 9            | 3-37        | 11-40       | 33-20       | 4 (2 x Cys)       | 0.92                       | 2.06 +/- 0.25              |
| 10           | 3-11        | 40-33       | 20-37       | 3 (3 x Cys)       | 1.42                       | 0.81 +/- 0.16              |
| 11           | 3-11        | 40-37       | 20-33       | 11 (4 x Cys)      | 1.59                       | 1.24 +/- 0.47              |
| 12           | 3-11        | 40-20       | 37-33       | 4 (1 x Cys)       | 0.68                       | 0.61 +/- 0.19              |
| 13           | 3-20        | 11-33       | 40-37       | 3 (1 x Cys)       | 0.55                       | 0.53 +/- 0.22              |
| 14           | 3-20        | 11-37       | 40-33       | 5 (1 x Cys)       | 0.69                       | 0.60 +/- 0.09              |
| 15           | 3-20        | 11-40       | 33-37       | 8 (3 x Cys)       | 1.44                       | 0.54 +/- 0.22              |

| <b>Nak1</b> | <b>DB 1</b> | <b>DB 2</b> | <b>DB 3</b> | <b>Violations</b> | <b>Target function avg</b> | <b>Avg backbone RMSD Å</b> |
|-------------|-------------|-------------|-------------|-------------------|----------------------------|----------------------------|
| No bonds    | -           | -           | -           | 2 (1 x Cys)       | 0.56                       | 0.40 +/- 0.08              |
| 1           | 1-39        | 10-32       | 19-36       | 3 (1 x Cys)       | 0.46                       | 0.43 +/- 0.15              |
| 2           | 1-39        | 10-36       | 19-32       | 7 (3 x Cys)       | 0.96                       | 0.37 +/- 0.09              |
| 3           | 1-39        | 10-19       | 36-32       | 6 (4 x Cys)       | 1.31                       | 0.32 +/- 0.06              |
| 4           | 1-32        | 10-39       | 19-36       | 9 (2 x Cys)       | 1.32                       | 0.26 +/- 0.09              |
| 5           | 1-32        | 10-36       | 19-39       | 7 (4 x Cys)       | 0.69                       | 0.37 +/- 0.09              |
| 6           | 1-32        | 10-19       | 36-39       | 12 (7 x Cys)      | 1.45                       | 0.45 +/- 0.14              |
| 7           | 1-36        | 10-32       | 39-19       | 13 (4 x Cys)      | 1.68                       | 0.31 +/- 0.09              |
| 8           | 1-36        | 10-19       | 32-39       | 15 (6 x Cys)      | 1.49                       | 0.40 +/- 0.09              |
| 9           | 1-36        | 10-39       | 32-19       | 15 (7 x Cys)      | 1.62                       | 0.47 +/- 0.09              |
| 10          | 1-10        | 39-32       | 19-36       | 6 (2 x Cys)       | 1.12                       | 0.22 +/- 0.08              |
| 11          | 1-10        | 39-36       | 19-32       | 4 (2 x Cys)       | 0.69                       | 0.28 +/- 0.21              |
| 12          | 1-10        | 39-19       | 36-32       | 8 (5 x Cys)       | 1.25                       | 0.39 +/- 0.12              |
| 13          | 1-19        | 10-32       | 39-36       | 17 (8 x Cys)      | 2.08                       | 0.33 +/- 0.12              |
| 14          | 1-19        | 10-36       | 39-32       | 20 (9 x Cys)      | 2.68                       | 0.46 +/- 0.10              |
| 15          | 1-19        | 10-39       | 32-36       | 22 (13 x Cys)     | 3.25                       | 0.28 +/- 0.10              |

DB – Disulfide bond

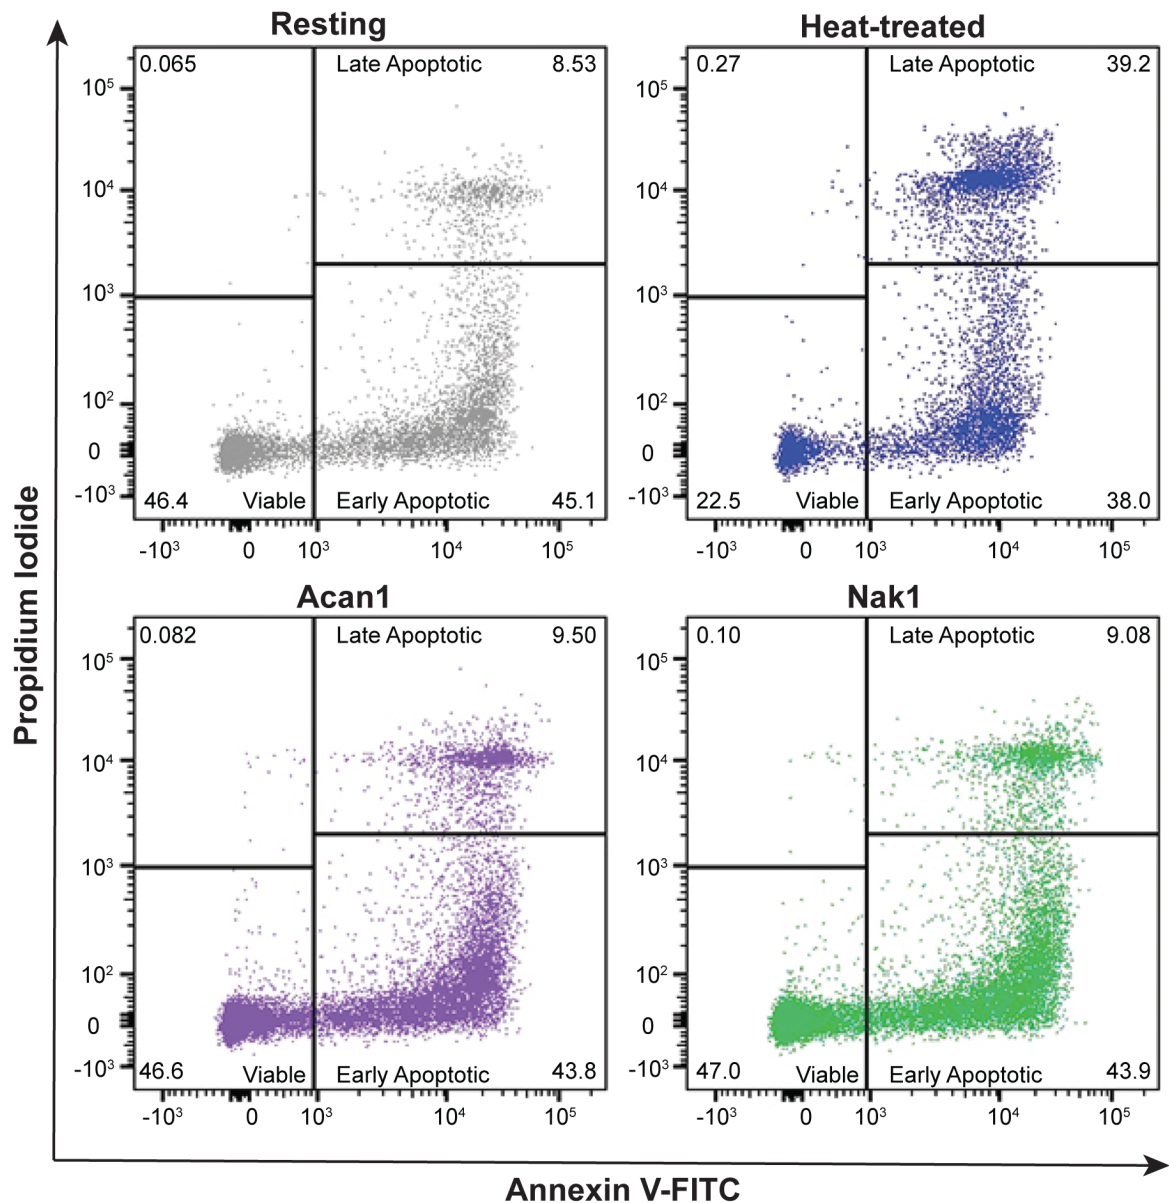

Figure S5: Annexin V apoptosis assay of peripheral blood mononuclear cells (PBMC) incubated with hookworm peptide. Human PBMCs were treated with Acan1 (purple) or Nak1 (green) at 10  $\mu\text{g}/\text{mL}$  for 4 hours at 37°C/10% CO<sub>2</sub>. A positive control (blue) was generated by heating cells to 56°C for 20 mins. Following treatment, PBMCs were labelled with Annexin V-FITC and propidium iodide and the percentage of apoptotic and necrotic populations assessed by flow cytometry (BD LSRFortessa).

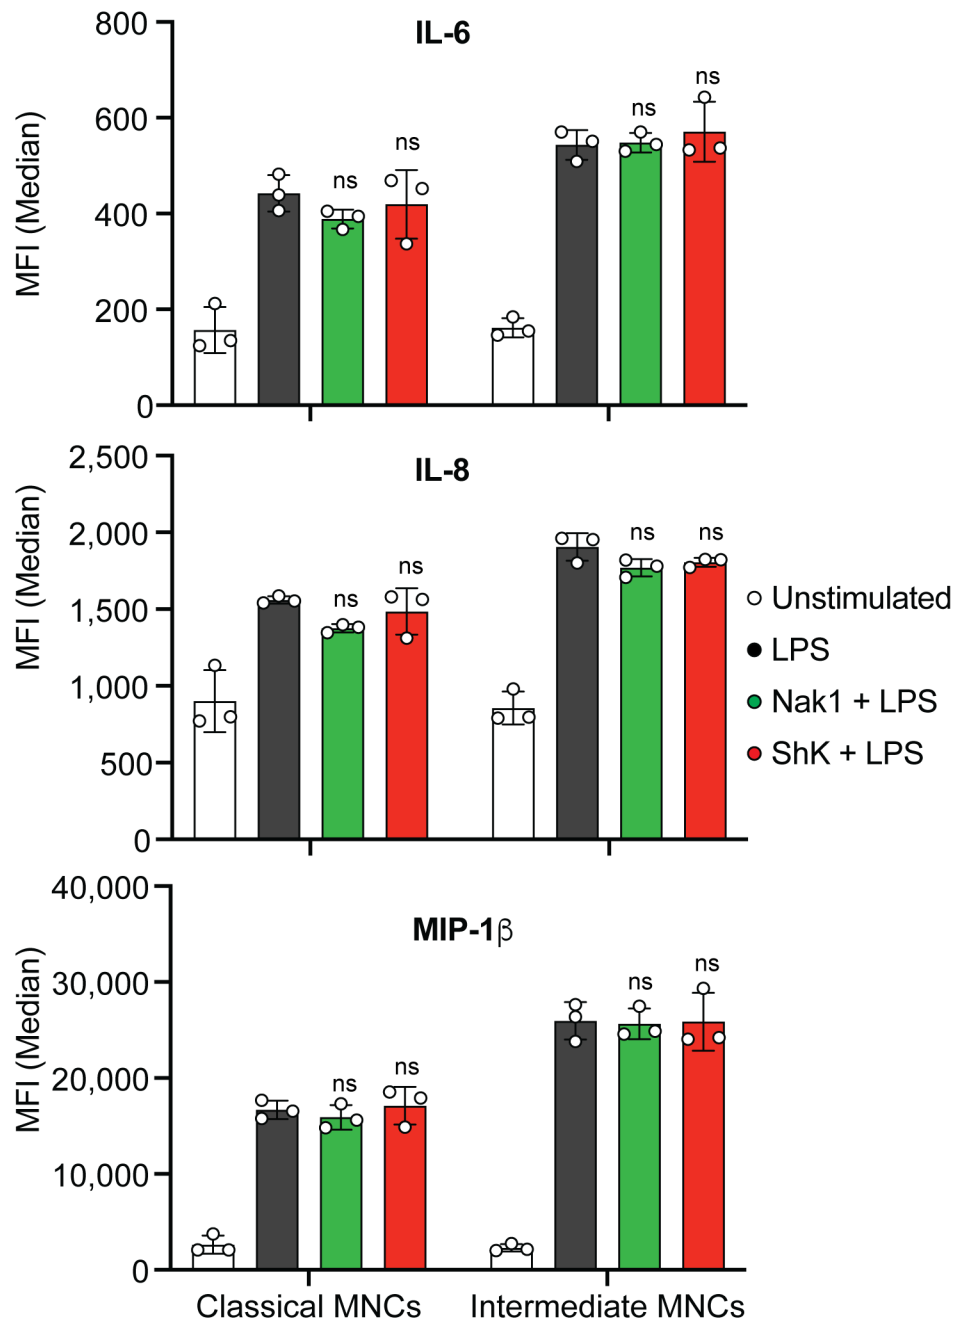

Figure S6: Intracellular cytokine staining for IL-6, IL-8 and MIP-1 $\beta$  in classical (CD14<sup>+</sup>) or intermediate (CD14<sup>+</sup>/CD16<sup>+</sup>) monocytes (MNCs) exposed to Nak1 or ShK. Human peripheral blood mononuclear cells were stimulated with 10 ng/mL lipopolysaccharide (LPS) then treated with Nak1 (100  $\mu$ g/mL) or ShK (10  $\mu$ g/mL) peptides for 24 h. Cytokine production was analysed by flow cytometry (BD LSRFortessa). Bars show mean MFI  $\pm$  SD. Symbols show replicate values. n = 3; ns, no statistical significance; student's t-test comparing LPS to peptide treatment.

## Mixed Lymphocyte Reaction

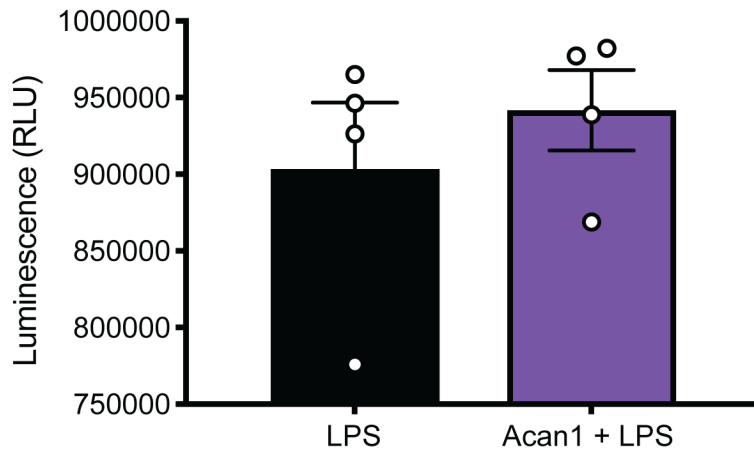

Figure S7: Mixed lymphocyte reaction using Acan1. Monocyte-derived dendritic cells (MoDCs) were generated from peripheral blood CD14<sup>+</sup> monocytes cultured with granulocyte-macrophage colony stimulating factor and IL-4 for 5 days. On day 5, CD14<sup>-</sup> MoDCs ( $1 \times 10^4$  cells/well) were stimulated with 100 ng/mL lipopolysaccharide (LPS) then treated with Acan1 (100  $\mu$ g/mL) for 24 h. Following incubation, isolated CD3<sup>+</sup> T cells were added to the samples at a ratio of 10:1 ( $1 \times 10^5$  T cells/well). Mixed cultures were incubated for a further 5 days. Metabolically active cells were then determined as a quantitation of ATP luminescence (RLU) using CellTiter-Glo Luminescent Cell Viability Assay. Bars show mean RLU  $\pm$  SD. Symbols show replicate values.

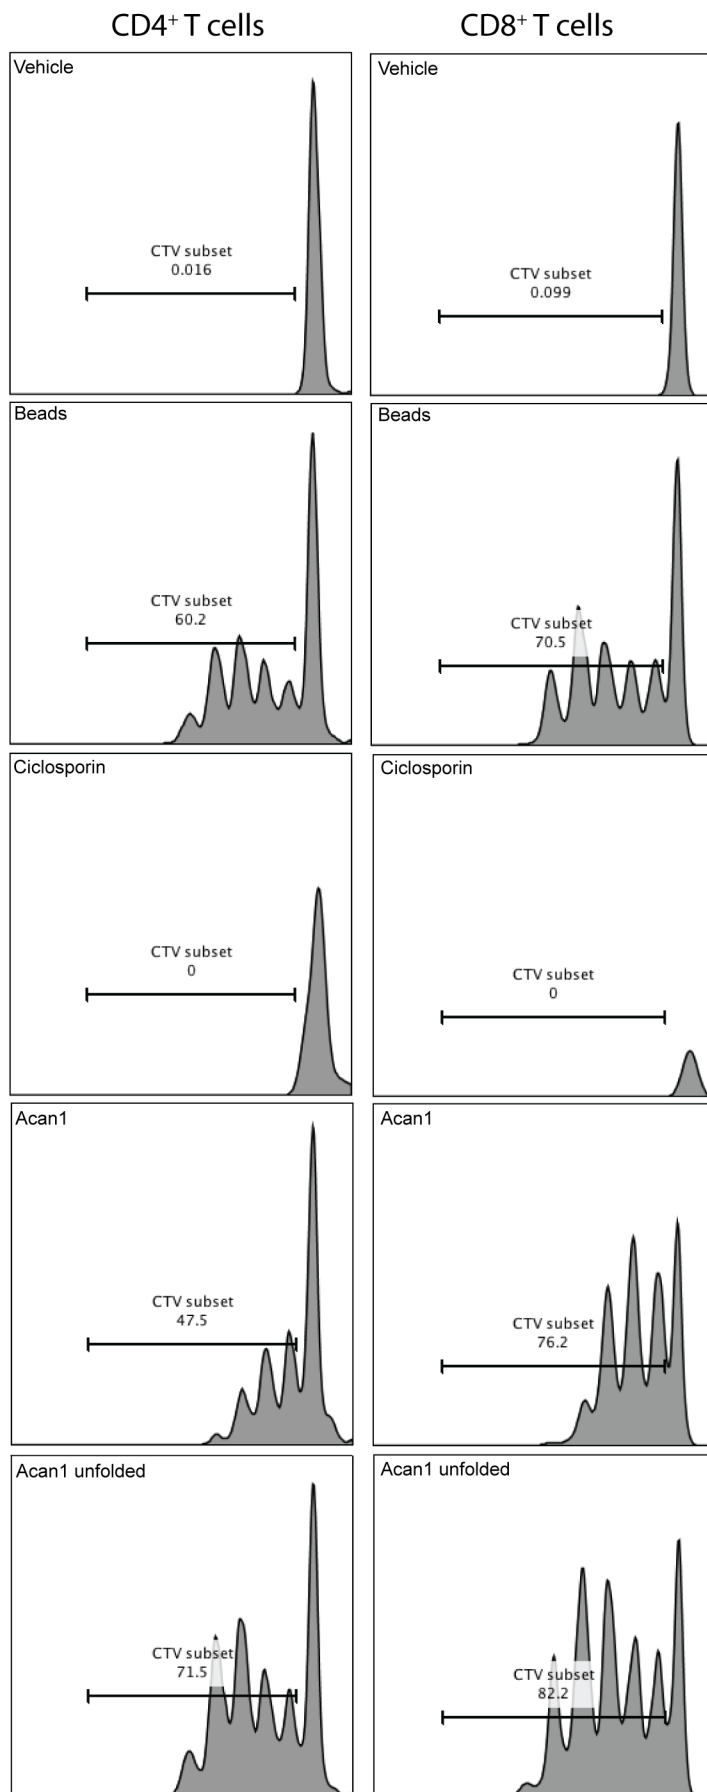

Figure S8: Example gating from CellTrace Violet proliferation assay showing T cell divisions. Purified human T cells were labelled with CellTrace Violet reagent then activated with anti-CD3/anti-CD28 stimulation beads. Activated T cells were treated with 10 µg/mL ciclosporin (suppressive control), 100 µg/mL Acan1, or 100 µg/mL unfolded Acan1 for 4 days at 37°C/5% CO<sub>2</sub>. The effect of folded and unfolded peptide on the percentage of live proliferating T cells was assessed by flow cytometry using a BD LSRFortessa (BD Bioscience).

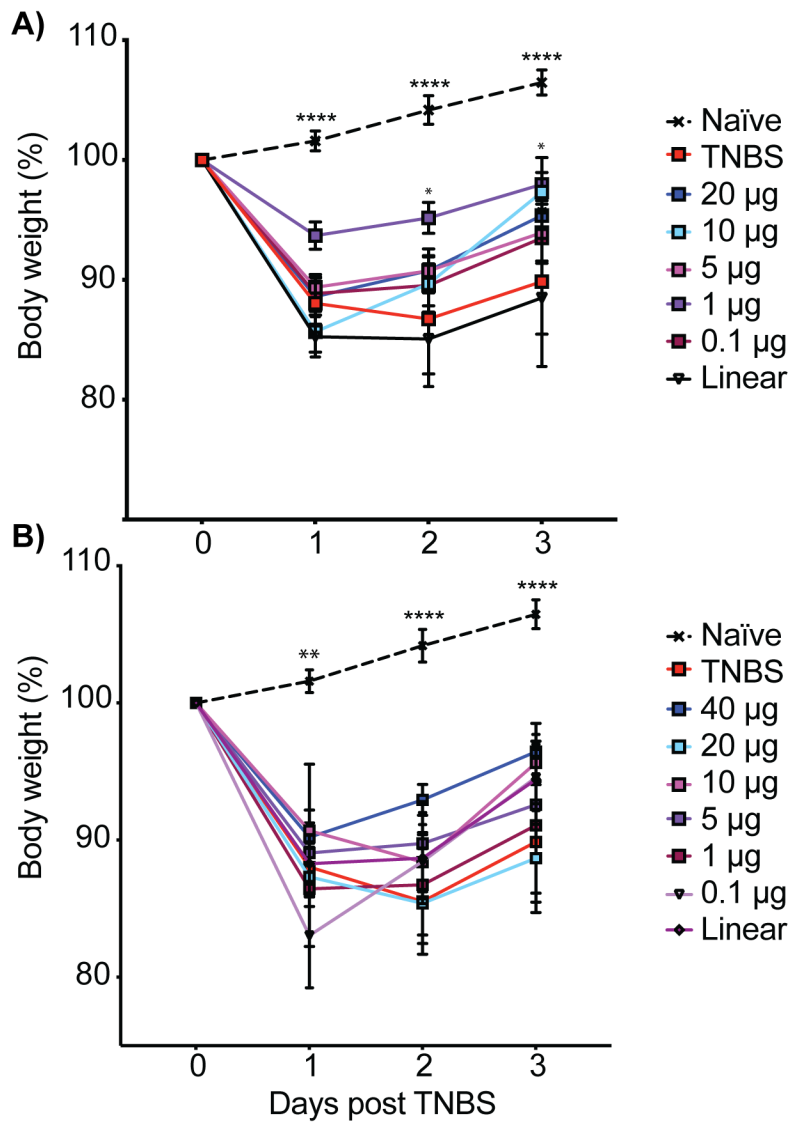

Figure S9: Mouse body weight was recorded daily for the indicated groups. Mice were administered ranging concentrations of **A)** Acan1 or **B)** Nak1 prior to TNBS at day 0 and weighed daily before being euthanised at day four. Data show mean $\pm$ s.e.m. of a representative experiment out of three with  $n = 5$ . Two-way ANOVA with Dunnett's multiple comparisons test was used to compare each group to vehicle over time; \* $p < 0.05$ ; \*\* $p < 0.01$ ; \*\*\* $p < 0.001$ ; \*\*\*\* $p < 0.0001$ .
